# Supplementary material for: Les dérivés de l'albumine d'oeuf: les essais en cave
Source: Royal Society of Chemistry journal article supplement (doi:10.1039/c8sm01656a), 2002-01-01
Supplement: c8sm01656a1.pdf [file c8sm01656a1.pdf]

## Supplementary Information for “Sidewall contact regulating the nanorod packing inside vesicles with relative volumes”

Zeming Wu,<sup>†</sup> Hongyan Yuan,<sup>‡</sup> Xinyun Zhang<sup>†</sup>, and Xin Yi<sup>†\*</sup>,

<sup>†</sup>Department of Mechanics and Engineering Science, College of Engineering, Peking University, Beijing 100871, China, and <sup>‡</sup>Department of Mechanical, Industrial and Systems, Engineering, University of Rhode Island, Kingston, Rhode Island 02881, United States

E-mail: xyi@pku.edu.cn

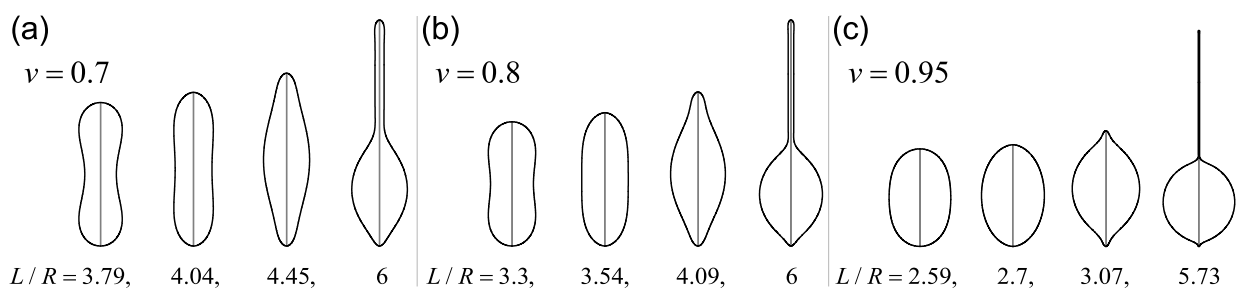

Fig. S1 Selected vesicle morphologies induced by the encapsulated cylindrical rigid nanorod of radius  $a/R = 0.01$  at  $v = 0.7, 0.8$  and  $0.95$ .

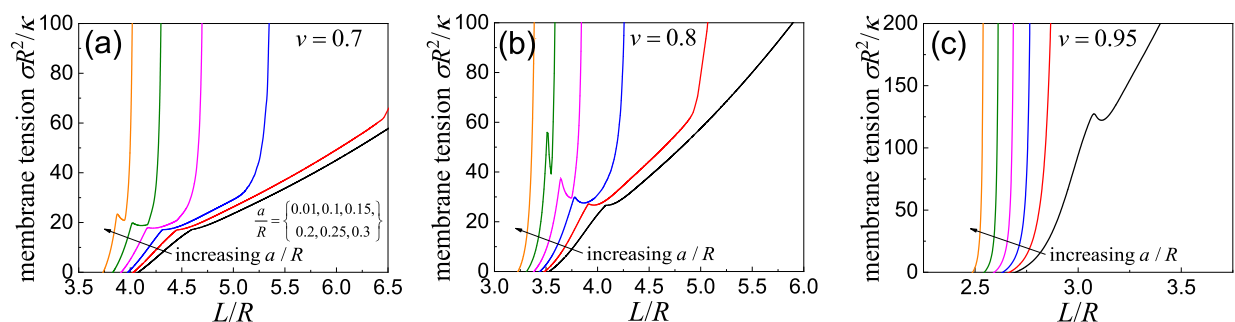

Fig. S2 Normalized effective membrane tension  $\sigma R^2 / \kappa$  as a function of the normalized length  $L/R$  of an encapsulated cylindrical nanorod at different reduced volumes  $v = 0.7, 0.8$  and  $0.95$ .

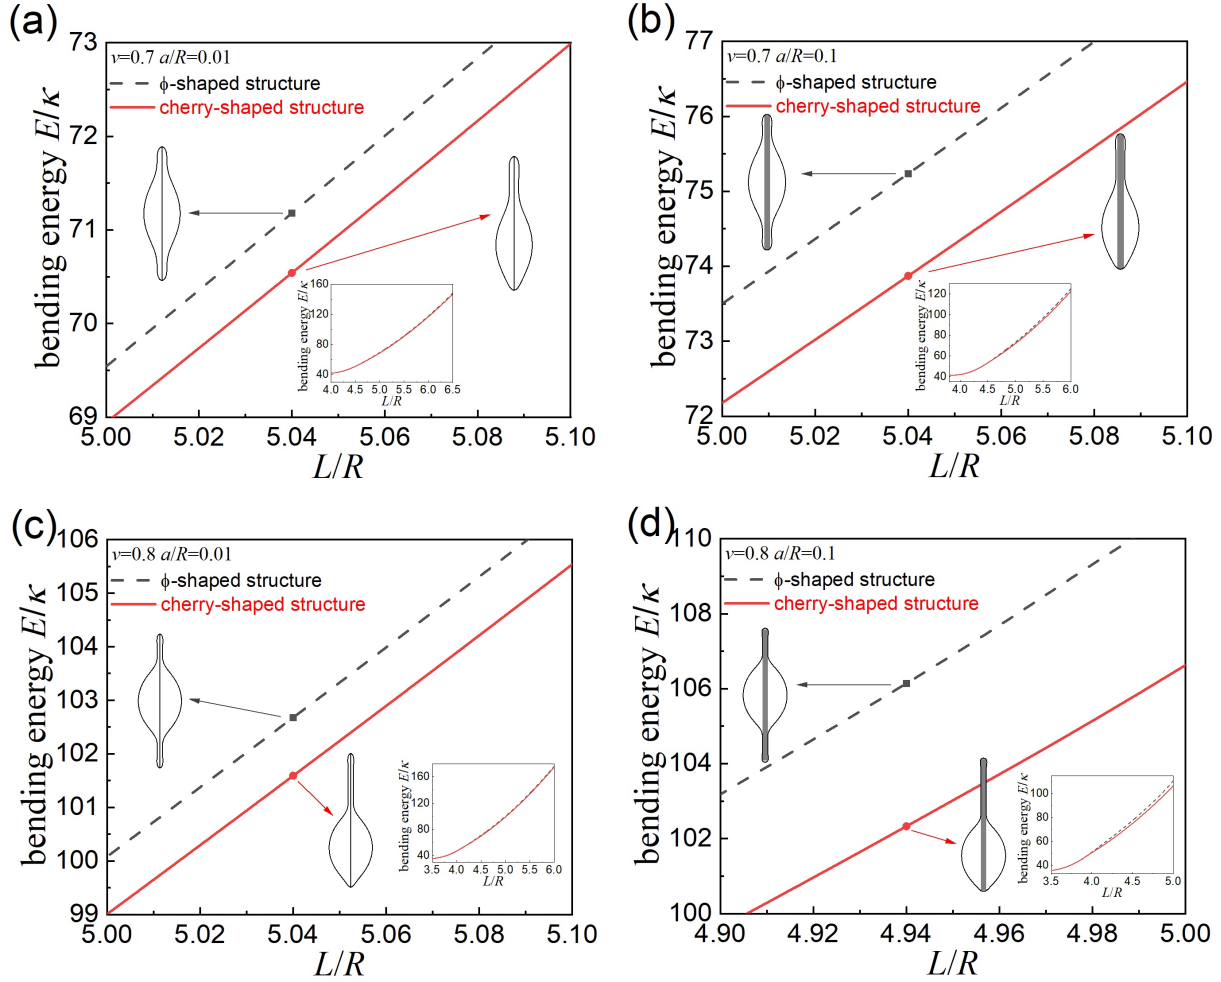

Fig. S3 The normalized deformation energy  $E/\kappa$  of the  $\phi$ -shaped and cherry-shaped vesicle morphologies at  $\nu = 0.7$  and  $0.8$  for cylindrical rigid nanorod of radius  $a/R = 0.01$  and  $0.1$ . Insets show the energy profiles in larger ranges of  $L/R$ .

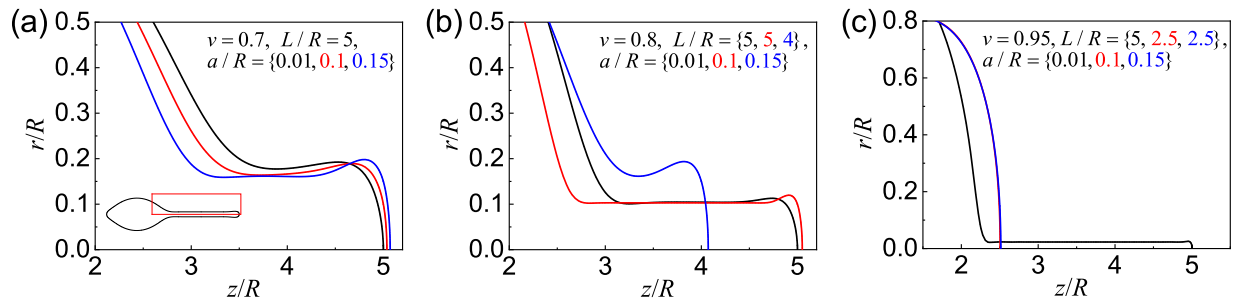

Fig. S4 Vesicle profiles magnified in the radial direction at different  $L/R$  and  $\nu$ . The profiles represent the zoomed-in vesicle portion in the red rectangle as illustrated in the inset in (a). The encapsulated nanorod is not shown here for clarity.

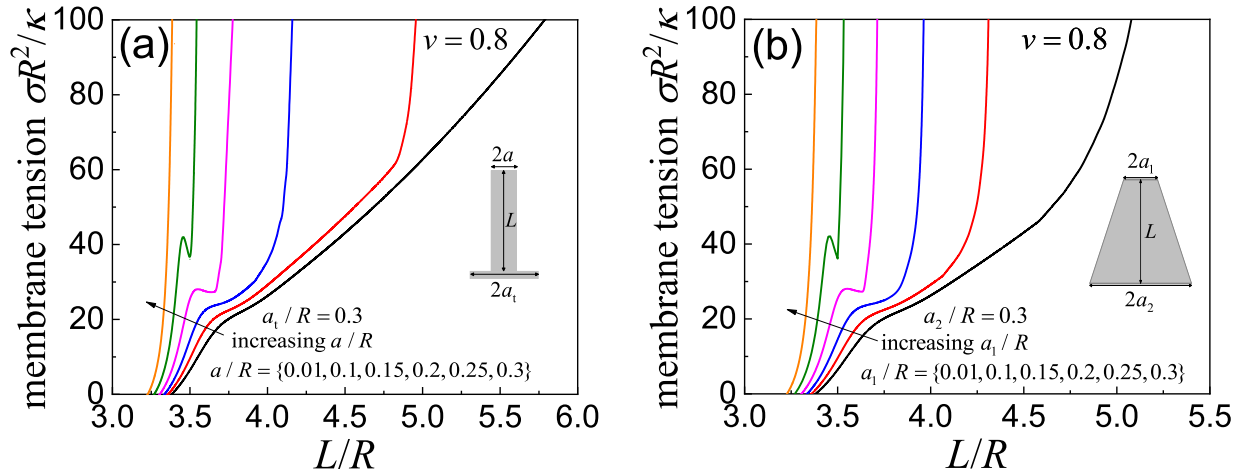

Fig. S5 The membrane tension  $\sigma R^2/\kappa$  as a function of  $L/R$  for an encapsulated cylindrical nanorod with one widened tip (a) and a cone-shaped nanorod (b) at  $\nu = 0.8$ . Here  $a$  and  $a_t$  in (a) represent the radii of the rod wall and tip, respectively;  $a_1$  and  $a_2$  in (b) represent radii of the top and bottom ends of the cone-shaped nanorod, respectively. Insets illustrate the nanorod geometry.

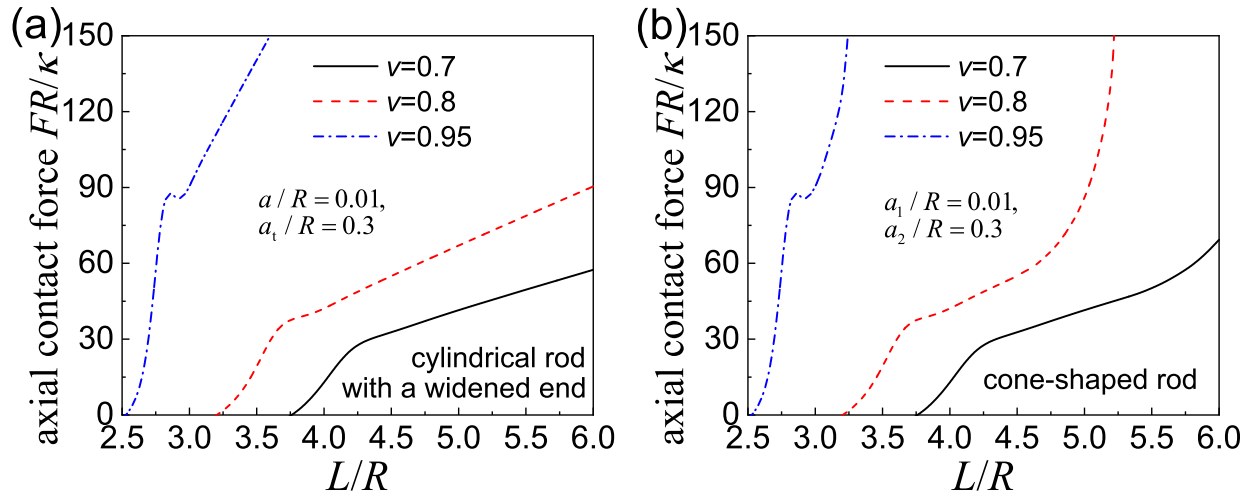

Fig. S6 Normalized axial contact force  $FR/\kappa$  as a function of  $L/R$  at different  $\nu$  for a cylindrical nanorod with one widened end (a) and a cone-shaped nanorod (b).
